# Supplementary material
Source: PubMed Central journal article supplement (PMC4528757)
Supplement: supp_pp.15.00559_00559revSupplemental_Information_proofs.pdf [file supp_pp.15.00559_00559revSupplemental_Information_proofs.pdf]

## SUPPLEMENTAL TABLES AND FIGURES

**Table S1:** Mass spectrometric identification of protein subunits present in the collected Mn<sub>1</sub> and Fe<sub>1</sub> fractions

| Protein name     | Mn <sub>1</sub> | Fe <sub>1</sub> | # unique peptides |                 | Accession     | Function               |
|------------------|-----------------|-----------------|-------------------|-----------------|---------------|------------------------|
|                  |                 |                 | Mn <sub>1</sub>   | Fe <sub>1</sub> |               |                        |
| Lhca3            | x               | x               | 4                 | 7               | gi: 326510901 | PSI antennae           |
| Lhca4            | x               | x               | 4                 | 4               | gi: 9624495   | PSI antennae           |
| PsaA             | x               | x               | 3                 | 4               | gi: 152032676 | PSI core               |
| PsaB             | x               | x               | 6                 | 8               | gi: 158512663 | PSI core               |
| PsaC             | x               | x               | 3                 | 5               | gi: 60392949  | PSI core               |
| PsaD             | x               | x               | 14                | 16              | gi: 548603    | PSI core               |
| PsaE             | x               | x               | 5                 | 8               | gi: 131176    | PSI core               |
| PsaF             | x               | x               | 7                 | 9               | gi: 326498793 | PSI core               |
| PsaG             | x               | x               | 5                 | 3               | gi: 131192    | PSI core               |
| PsaH (1)         |                 | x               |                   | 5               | gi: 131196    | PSI core               |
| PsaH (2)         | x               |                 | 6                 |                 | gi: 326534178 | PSI core               |
| PsaK             | x               | x               | 4                 | 4               | gi: 268612172 | PSI core               |
| PsaN             | x               | x               | 4                 | 7               | gi: 326506464 | PSI core               |
|                  |                 |                 |                   |                 |               |                        |
| Lhcb1            | x               |                 | 3                 |                 | gi: 326520097 | PSII antennae          |
| Lhcb4 (CP29)     | x               | x               | 9                 | 9               | gi: 445116    | PSII antennae          |
| Lhcb5 (CP26)     | x               | x               | 13                | 5               | gi: 326511355 | PSII antennae          |
| Lhcb6 (CP24)     | x               | x               | 8                 | 7               | gi: 326529461 | PSII antennae          |
| PsbA (D1)        | x               | x               | 8                 | 7               | gi: 131248    | PSII core              |
| PsbB (CP47)      | x               | x               | 11                | 12              | gi: 11594     | PSII core              |
| PsbC (CP43)      | x               | x               | 11                | 10              | gi:126302587  | PSII core              |
| PsbD (D2)        | x               | x               | 10                | 12              | gi: 12592     | PSII core              |
| PsbE (cyt b559α) | x               | x               | 4                 | 4               | gi: 60392973  | PSII core              |
| PsbO             | x               | x               | 22                | 17              | gi: 326494020 | PSII OEC               |
| PsbQ             | x               | x               | 10                | 6               | gi: 326516042 | PSII OEC               |
| PsbQ-like        | x               | x               | 4                 | 3               | gi: 326503564 | PSII OEC               |
| PsbR             | x               | x               | 3                 | 5               | gi: 326510039 | PSII OEC               |
| PsbS             | x               | x               | 8                 | 5               | gi: 326523967 | PSII antennae quencher |

Protein subunits belonging to either PSI or PSII are listed. The proteins are given by their trivial name. Positive identifications in a given fraction is indicated by (x) along with the number (#) of unique peptides, gi number, and the protein function.

**Table S2:** Photosynthetic parameters for Antonia and Vanessa grown under control conditions or exposed to mild, moderate and severe Mn deficiency

| Treatment            | Antonia (Mn inefficient) |                        |                         |                         | Vanessa (Mn efficient) |                         |                         |                        |
|----------------------|--------------------------|------------------------|-------------------------|-------------------------|------------------------|-------------------------|-------------------------|------------------------|
|                      | Mn deficiency            |                        |                         |                         |                        |                         |                         |                        |
|                      | control                  | mild                   | moderate                | severe                  | control                | mild                    | moderate                | severe                 |
| Chl <i>a/b</i> ratio | 2.39±0.15 <sup>a</sup>   | 2.14±0.02 <sup>b</sup> | 2.05±0.02 <sup>bc</sup> | 2.03±0.01 <sup>bc</sup> | 2.32±0.00 <sup>a</sup> | 2.10±0.00 <sup>bc</sup> | 2.02±0.01 <sup>bc</sup> | 1.95±0.04 <sup>c</sup> |
| Chl <i>a+b</i>       | 70.9±3.8 <sup>a</sup>    | 56.2±2.0 <sup>bc</sup> | 60.6±1.6 <sup>b</sup>   | 61.4±3.1 <sup>b</sup>   | 77.6±2.5 <sup>a</sup>  | 71.7±1.3 <sup>a</sup>   | 61.4±0.7 <sup>b</sup>   | 47.7±5.6 <sup>c</sup>  |
| Fv/Fm                | 0.82±0.00 <sup>a</sup>   | 0.72±0.01 <sup>b</sup> | 0.64±0.00 <sup>d</sup>  | 0.58±0.01 <sup>e</sup>  | 0.82±0.00 <sup>a</sup> | 0.69±0.01 <sup>c</sup>  | 0.62±0.01 <sup>d</sup>  | 0.54±0.00 <sup>f</sup> |
| F0                   | 264±6 <sup>f</sup>       | 322±31 <sup>de</sup>   | 384±21 <sup>bc</sup>    | 397±14 <sup>bc</sup>    | 279±6 <sup>ef</sup>    | 373±23 <sup>cd</sup>    | 430±9 <sup>b</sup>      | 545±25 <sup>a</sup>    |
| Fm                   | 1441±33 <sup>a</sup>     | 1169±73 <sup>bc</sup>  | 1075±48 <sup>cd</sup>   | 964±37 <sup>d</sup>     | 1514±25 <sup>a</sup>   | 1223±55 <sup>b</sup>    | 1123±22 <sup>bc</sup>   | 1179±57 <sup>bc</sup>  |

The Chl composition of thylakoids was determined using HPLC. The content of Chl *a+b* is expressed in pmol  $\mu\text{g}^{-1}$  protein. Fluorescence parameters were measured on the youngest fully emerged leaf after 25 min. of dark adaptation. Fv/Fm, maximum quantum yield of PSII. F0, minimal fluorescence. Fm, maximal fluorescence. Values are means  $\pm$  SE ( $n = 3$ ). Values followed by the same letter are not significantly different ( $p \geq 0.05$ ).

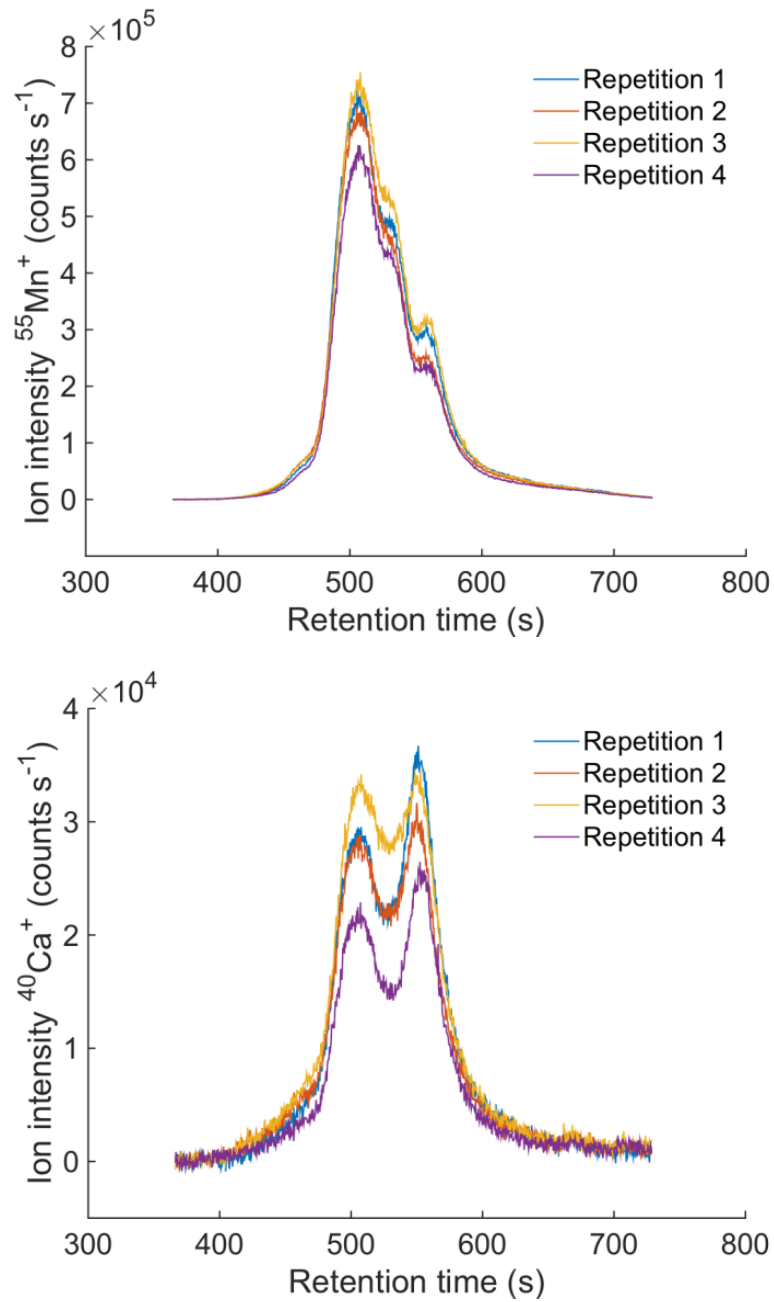

**Figure S1:** Background corrected chromatographic signals for  $^{55}\text{Mn}^+$  (upper chromatogram) and  $^{40}\text{Ca}^+$  (lower chromatogram) from four independent size-fractionated thylakoid preparations.

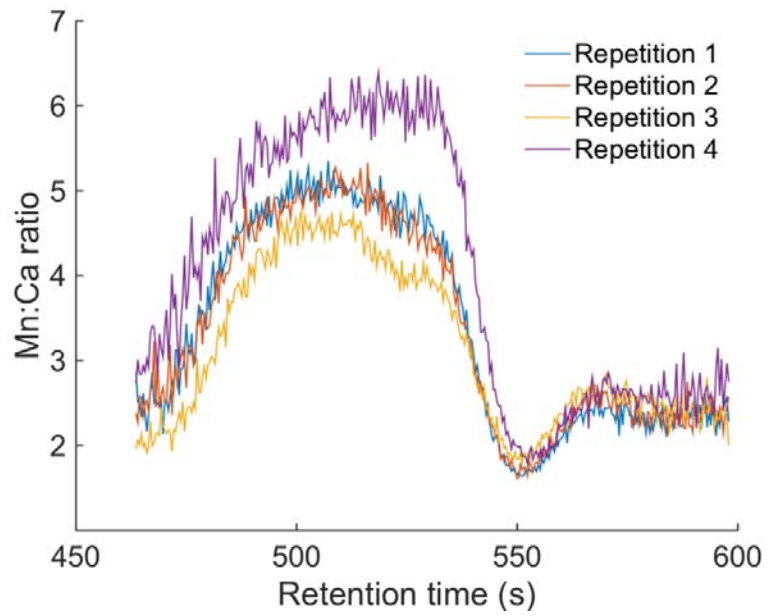

**Figure S2:** Measured molar Mn to Ca ratio as a function of the retention time for four independent size-fractionated thylakoid preparations. The least overlap with additional chromatographic Mn and Ca peaks is observed in the early part of the chromatographic signal (retention time 475 to 510 s). Here an approximate molar Mn to Ca ratio between 4 and 5 is detected.

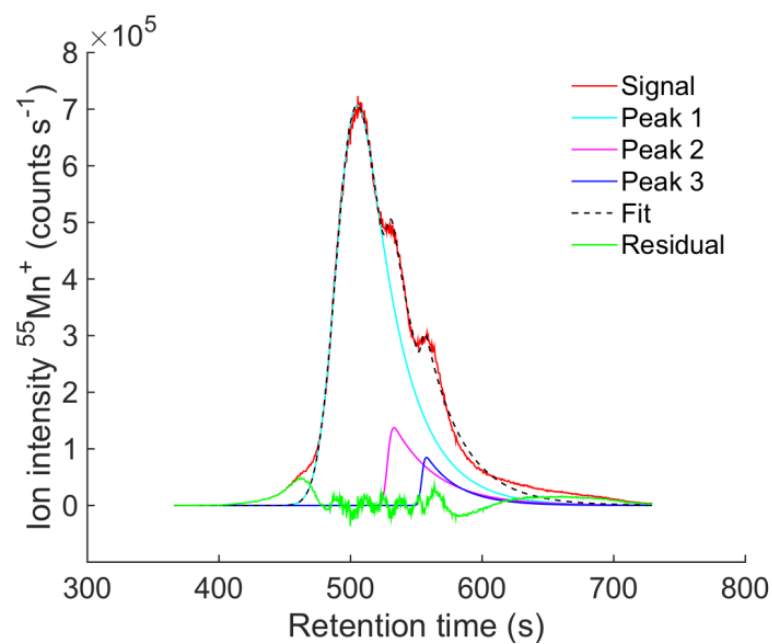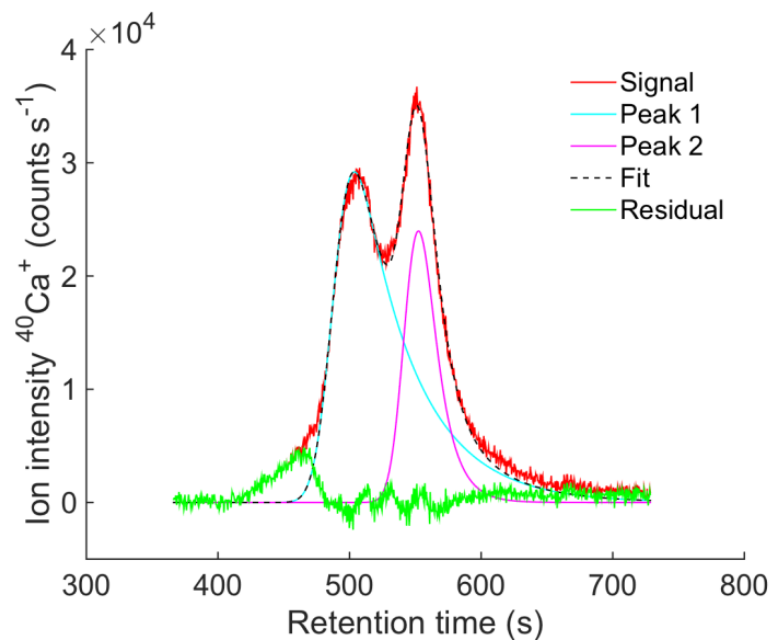

**Figure S3:** Peak fittings (for repetition 1 in Fig. S1 and S2) using EMG profile for Mn (upper panel) and Ca (lower panel). Background corrected chromatographic ion intensity data (signal), individual peak fits (peak #), the sum of all peak fits (fit), and signal minus fit (residual). The unexplained hump observed at approximately 450 s in the residual for both the Mn and Ca fit is most likely due to PSII fragments not sufficiently solubilized. The overall peak shape observed in the presented chromatograms was consistent across the four repetitions and the multiple fitting iterations.

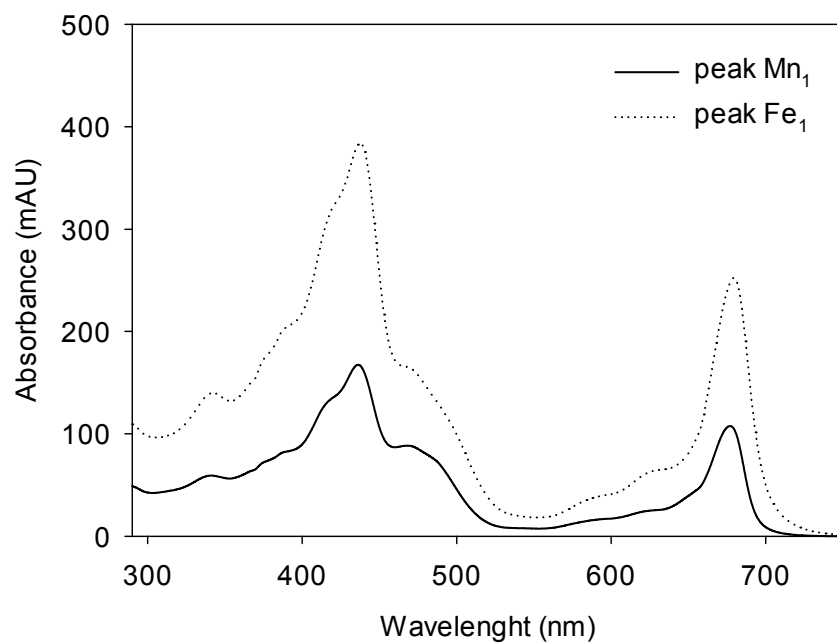

**Figure S4:** Spectroscopic characteristics. Absorption spectra of fractions containing the largest Mn and Fe peaks (Mn<sub>1</sub> and Fe<sub>1</sub>), corresponding to the size exclusion chromatogram in Fig. 3A.

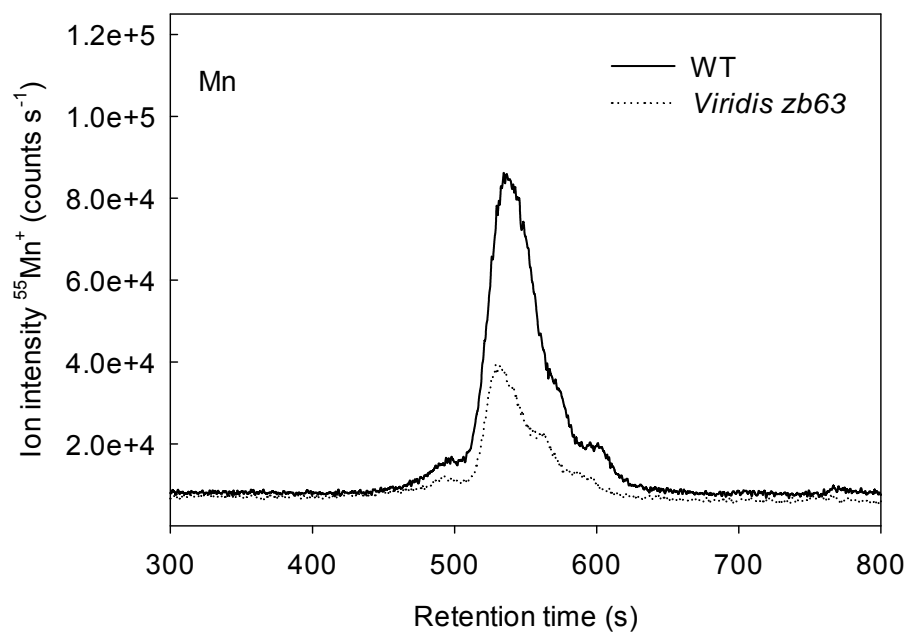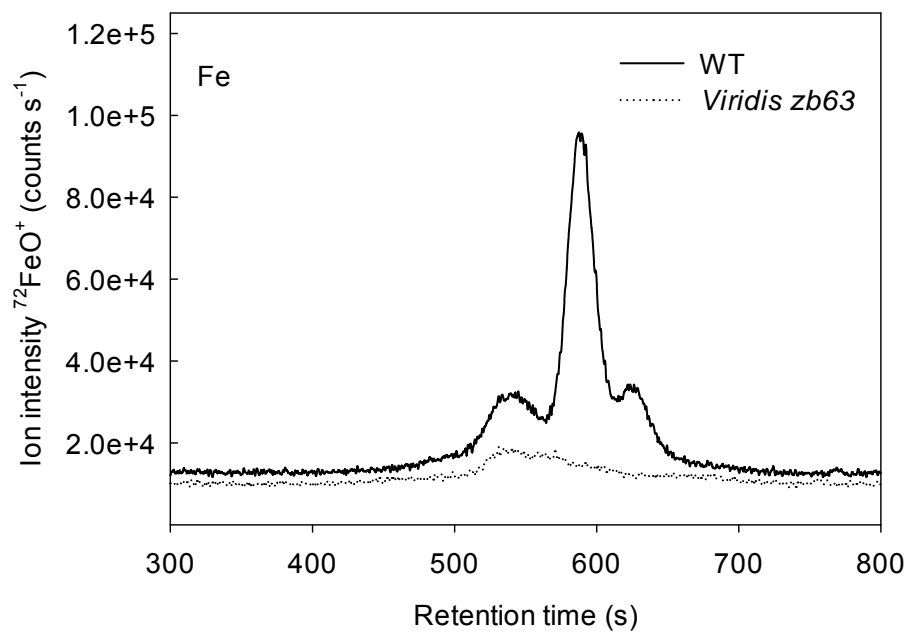

**Figure S5:** Elution profiles for  $^{55}\text{Mn}^+$  (upper chromatogram) and  $^{72}\text{FeO}^+$  (lower chromatogram) of size-fractionated thylakoids from the barley PSI-less mutant, *viridis zb63* and the corresponding wild type (WT).

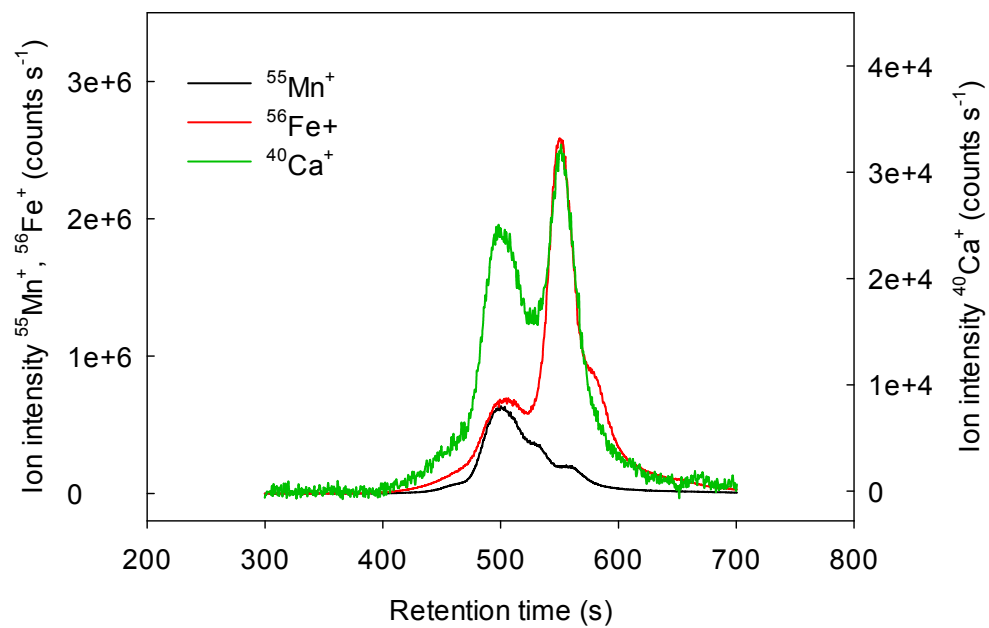

**Figure S6:** Elution profiles for  $^{55}\text{Mn}^+$ ,  $^{56}\text{Fe}^+$ , and  $^{40}\text{Ca}^+$  measured in  $\text{H}_2$ -mode of size-fractionated barley thylakoids.
